# Supplementary material
Source: Springer Nature journal article supplement (https://www.springermedizin.de/resource/supplementary/12936_2006_251_MOESM1_ESM.pdf/9547314)
Supplement: MOESM1 [file 9547314]

**Malaria  
screened  
5506**

**Enrolled\*:  
971**

**Excluded:**  
Not meeting inclusion criteria: 4370  
Refused to participate: 93  
Visitors: 72

**Randomisation**

**SP 486**

**AL 485**

1 did not receive  
malaria treatment due  
to vomiting

Lost to follow up 19  
Discontinued intervention:  
Withdrew: 1  
Excluded: 2

Lost to follow up 16  
Discontinued intervention:  
Withdrew: 2  
Excluded: 3

**Day 3**  
Early treatment failure: 25

**Day 3**  
Early Treatment failure: 2

Lost to follow up 64  
Discontinued intervention:  
Withdrew: 6  
Excluded: 3

Lost to follow up 56  
Discontinued intervention:  
Withdrew: 2  
Excluded: 1

New infections: 18  
**391 patients included  
in per protocol  
analysis**

New infections: 19  
**404 patients included  
in per protocol  
analysis**
